# Supplementary material for: Endothelial Cells Activated by Extracellular Histones Promote Foxp3+ Suppressive Treg Cells In Vitro
Source: MDPI journal article supplement (doi:10.3390/ijms23094527), 2022-04-20
Supplement: s1 [file s1]

**Type of paper:** Brief reports

**Title:** Endothelial cells activated by extracellular histones promote FoxP3<sup>+</sup> suppressive Treg cells *in vitro*

## Supplemental data

Figure S1: Effect of histones H1, H2A, H3 and H4 on HMECs

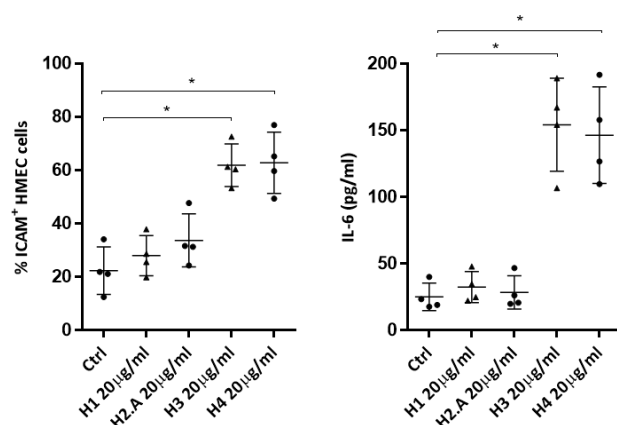

ICAM-1 was assessed in HMEC cells activated with 20 µg/mL of purified individual histones (H1, H2.1, H3, H4). Percentage of positive cells were evaluated by cytometry. Levels of IL-6 in the supernatant were measured by ELISA. Kruskal-Wallis test, \* $p=0.006$ ,  $n=4$

Figure S2: Anti-TLR2 effect on endothelial cells expression of ICAM-1, PDL-1 and secretion of IL-6

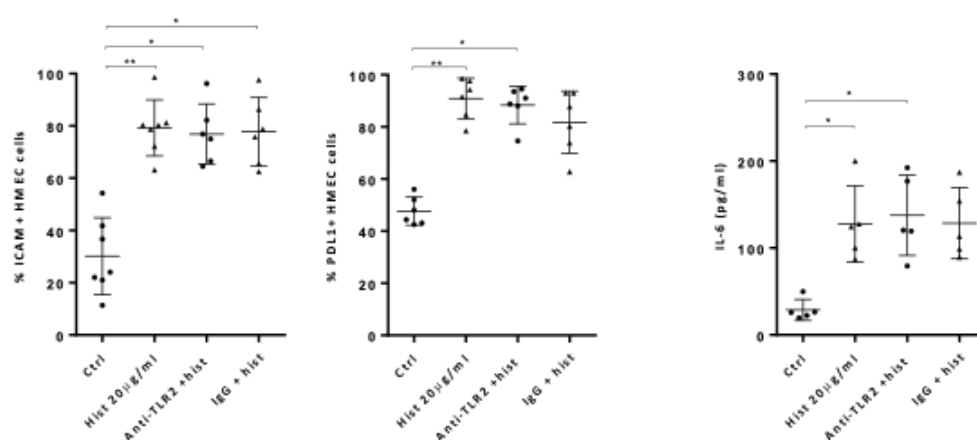

CD54 (ICAM-1) and CD106 (Vascular cell adhesion protein 1 (VCAM-1)) expression were measured on Human Microvascular Endothelial Cells (HMEC) after treatment with 20 µg/mL

histone, with or without IgG anti-TLR2 50 µg/mL or a control IgG antibody 50 µg/mL. Median Fluorescence Intensity (MFI) and percentage of positive cells were measured by cytometry.

Kruskal-Wallis test, \*\*\* $p=0,002$ ,  $n = 6$

InterLeukin-6 was measured by ELISA in the supernatant. Kruskal-Wallis test, \*\* $p=0.013$ ,  $n=5$

Figure S3: Effect of sex and age of PBMCs donors on Treg expansion

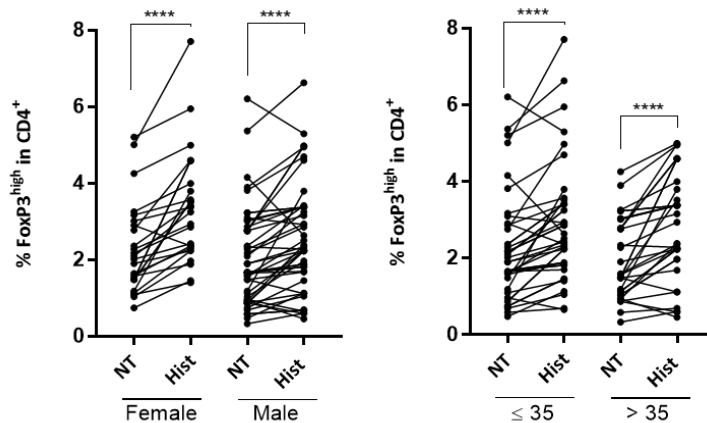

Comparison of Treg expansion after 3-days of coculture, with or without histone pre-stimulation of HMECs. Left panel are results presented as percentage of CD4<sup>+</sup> CD25<sup>+</sup> CD127<sup>low</sup> FoxP3<sup>high</sup> among CD4<sup>+</sup> cells according to the sex of the PBMCs donors. Wilcoxon test, \*\*\*\* $p<0,0001$

Right panel are results presented as percentage of CD4<sup>+</sup> CD25<sup>+</sup> CD127<sup>low</sup> FoxP3<sup>high</sup> among CD4<sup>+</sup> cells according to the age of the PBMCs donors. Age ≤ 35 years old,  $n=40$ ; age > 35 years-old,  $n=33$ . 35 years-old corresponds to the median age of the PBMCs donors. Wilcoxon test, \*\*\*\* $p<0,0001$ .

Figure S4: Gating strategy for Treg cells identification and phenotype

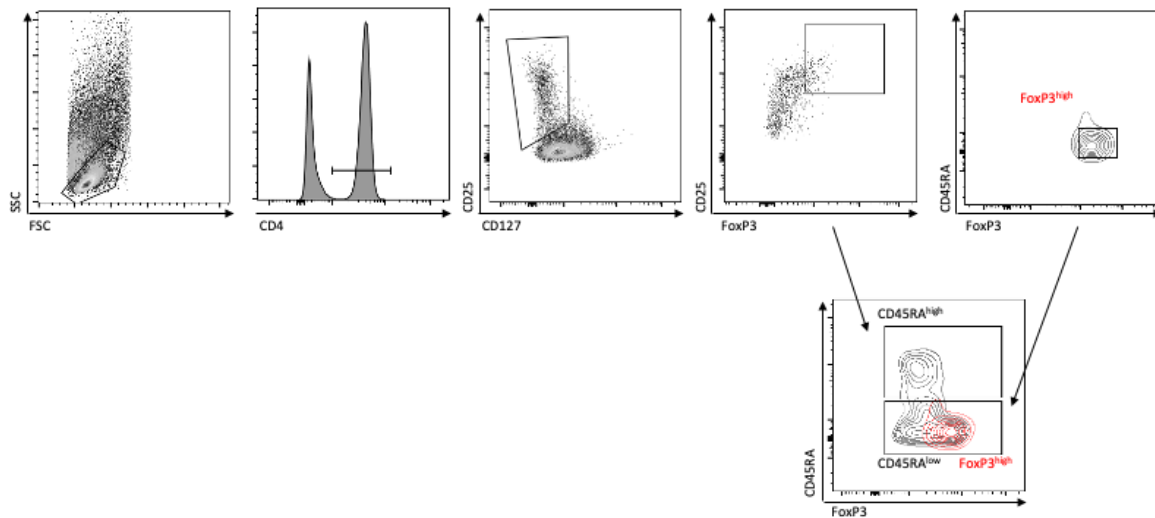

Gating strategy to identify Treg cells after 3 days of coculture with HMEC stimulated with histone for 18h. Treg cells are CD4<sup>+</sup> CD25<sup>+</sup> CD127<sup>low</sup> FoxP3<sup>high</sup> T lymphocytes, memory Treg are CD45<sup>-</sup> and naïve Treg cells are CD45RA<sup>+</sup>. Gating was performed using Fluorescence Minus One (FMO) control.

Figure S5: Th17, Th1 and Treg RORγT<sup>+</sup> population at the end of 3-days cocultures

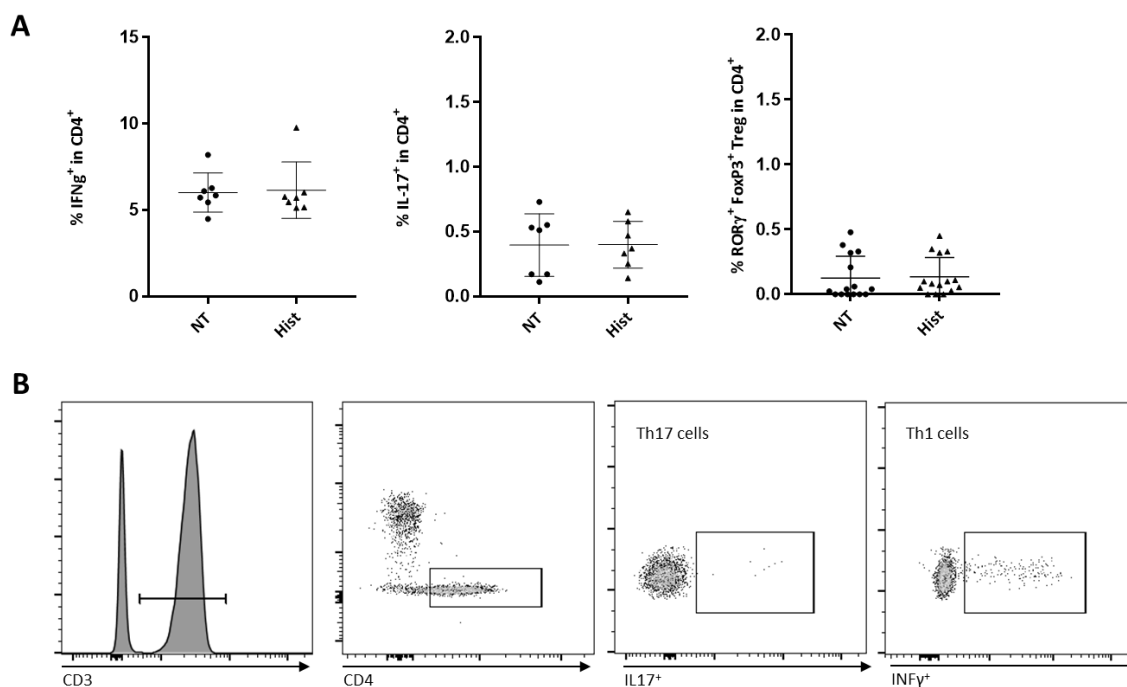

A/ Comparison of Th17, Th1 and ROR $\gamma$ t-Treg<sup>+</sup> expansion after 3 days of coculture, with or without histone pre-stimulation of HMECs. Results are presented as percentages of respectively CD3<sup>+</sup> CD4<sup>+</sup> IL-17<sup>+</sup> and CD3<sup>+</sup> CD4<sup>+</sup> IFN $\gamma$ <sup>+</sup> among CD4<sup>+</sup> cells.  $n=7$  for Th1 and Th17 cells,  $n=30$  for ROR $\gamma$ t<sup>+</sup> Tregs cells. Paired t test (ns).

B/ Gating strategy for Th1 and Th17 cells. FoxP3 ROR $\gamma$ t<sup>+</sup> are defined as CD4<sup>+</sup> CD25<sup>+</sup> CD127<sup>low</sup> FoxP3<sup>high</sup> ROR $\gamma$ t<sup>+</sup>.

Figure S6: Suppression assay method

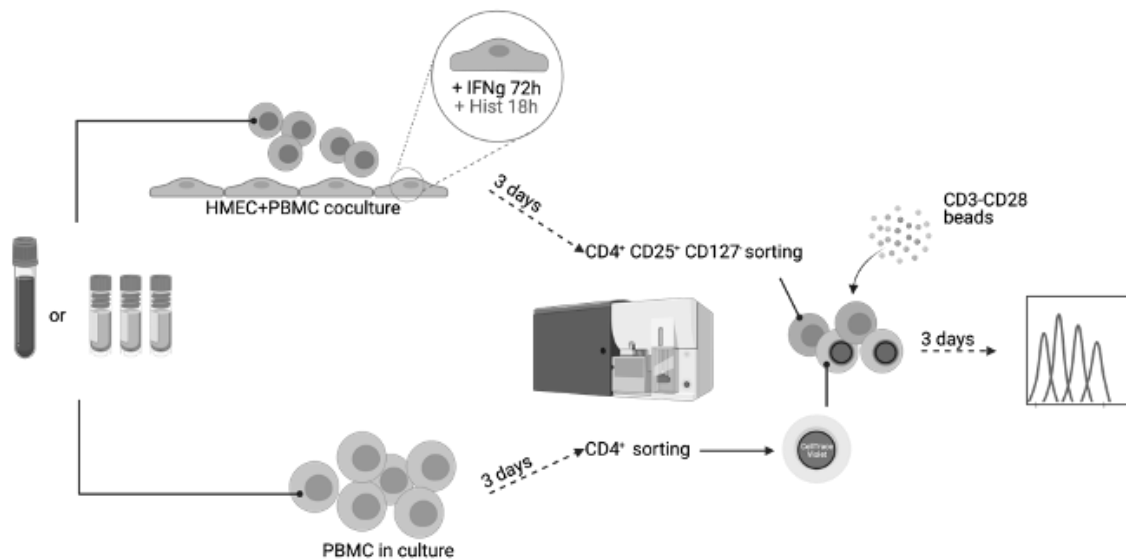

PBMCs were prepared from fresh donor blood or thawed, and cocultured as described above. We used methods previously described in literature [17], [52] for the following protocol. Treg cells are generated in our in vitro model, for 3 days in cocultures with histone-stimulated endothelial cells. Tregs were stained with CD4 FITC, CD25 PE, and CD127 PerCP-Cy5.5 and sorted on a BD FACS Aria II system. In parallel, autologous PBMCs were cultured in T25 flasks and CD4<sup>+</sup> T cells were sorted the same day as Tregs on BD FACS Aria II, with a CD4 FITC prior staining with CellTrace Violet proliferation kit (ThermoFisher). These cells are considered as responders T cell (Tresp). Sorted Tregs and stained Tresp were then cocultured together at different ratio for 3 days. We added Dynabeads T activator CD3/CD28 (ThermoFischer), 1/10 diluted. Proliferation of Tresp cells was analyzed by flow cytometry on BD FACS Cantoll.

Table S1: HMEC1 phenotype

| Percentage of HMEC positive cells |        | IFN $\gamma$ |       |       |       |
|-----------------------------------|--------|--------------|-------|-------|-------|
|                                   |        | NT           | Hist  | -     | Hist  |
| Adhesion molecules                | CD31   | 55,3         | 55,5  | 61,45 | 63,15 |
|                                   | CD54   | 3,07         | 21,7  | 49,9  | 59,5  |
| HLA molecules                     | HLA-DR | 0,00861      | 0,018 | 88,7  | 89,2  |
|                                   | HLA-I  | 95,8         | 96,6  | 81,5  | 75,3  |
| Co-stimulatory molecules          | CD274  | 0,69         | 12,5  | 54,3  | 57,7  |

HMEC1 cells phenotype without any treatment (NT), with or without Interferon (IFN) $\gamma$  at 30ng/ml for 3 days and with or without extracellular histones (hist) at 20 $\mu$ g/ml during 18h. Results are presented as percentage of positive cells for each marker. VCAM, 4-1 BBL, CD62P were not detectable by cytometry on HMEC1 cells.
